# Supplementary material for: An evidence-based model to consolidate medication adherence cost estimation: the medication adherence cost estimation framework
Source: Atypon-hosted journal article supplement (doi:10.2217/cer-2018-0099), 2019-05-22
Supplement: supplementary table 1.xlsx [file supplementary%20table%201.xlsx]

## Sheet: Sheet1
Study	direct costs	indirect costs	total costs	total healthcare costs	medical costs	Hospital costs	inpatient costs	outpatient costs	emergency department visit costs	behavioural health inpatient costs	acute care costs	primary care costs	physician office visit costs	ancillary costs	services costs	medical services costs	external services costs	psychiatric assessment costs	targeted case management costs	interdisciplinary costs	institutional costs	medical test costs	laboratory costs	radiology costs	fracture costs	prescription medication costs	other pharmacy costs	direct non-medical costs	arrest costs	incarceration costs	short term disability costs	workers compensation costs	paid time off costs	total productivity costs	absenteeism costs	presenteeism costs	ABC Taxonomy Classification
Alvarez Payero M, Martinez Lopez de Castro N, Ucha Samartin M, Martin Vila A, Vazquez Lopez C, Pineiro Corrales G	X				X	X																															implementation discontinuation
An SY, Kim HJ, Chun KH, Kim TH, Jeon JY, Kim DJ, Han SJ, Kim YS, Woo JT, Ahn KJ, Park Y, Nam M, Baik SH, Lee KW	X		X		X	X		X																													implementation
Aubert RE, Yao J, Xia F, Garavaglia SB	X			X	X																																initiation implementation discontinuation
Bagalman E, Yu-Isenberg KS, Durden E, Crivera C, Dirani R, Bunn WB, 3rd	X	X	X		X																										X	X	X				implementation
Barnett PG, Chow A, Joyce VR, Bayoumi AM, Griffin SC, Nosyk B, Holodniy M, Brown ST, Sculpher M, Anis AH, Owens DK			X		X																																implementation
Becker MA, Young MS, Ochshorn E, Diamond RJ			X		X																																implementation
Briesacher BA, Andrade SE, Yood RA, Kahler KH	X		X		X	X	X	X																		X											initiation implementation
Buysman EK, Anderson A, Bacchus S, Ingham M	X				X																					X											implementation discontinuation
Candrilli SD, O'Brien SH, Ware RE, Nahata MC, Seiber EE, Balkrishnan R	X		X		X	X	X		X				X	X												X											initiation implementation
Carter CT, Waters HC, Smith DB	X				X	X																															initiation implementation discontinuation
Casciano JP, Dotiwala ZJ, Martin BC, Kwong WJ	X		X		X	X	X	X																		X											initiation implementation discontinuation
Cooke CE, Lee HY, Xing S	X			X	X	X	X	X																		X											implementation
Curtis SE, Boye KS, Lage MJ, Garcia-Perez LE.	X		X		X	X		X			X															X											initiation implementation
Darkow T, Henk HJ, Thomas SK, Feng W, Baladi JF, Goldberg GA, Hatfield A, Cortes J	X			X	X	X	X	X	X																	X	X	X									initiation implementation discontinuation
Davis JR, Wu B, Kern DM, Tunceli O, Fox KM, Horton J, Legg R, Trudo F	X		X		X																					X											initiation implementation
Davis KL, Edin HM, Allen JK	X		X		X	X		X																		X											initiation implementation discontinuation
Davis KL, Candrilli SD, Edin HM	X		X		X																					X											initiation implementation
Delea TE, Stanford RH, Hagiwara M, Stempel DA	X		X		X	X		X	X																			X									initiation implementation
Delea TE, Thomas SK, Hagiwara M	X		X		X	X	X																			X		X									implementation
Diehl JL, Daw JR, Coley KC, Rayburg R	X		X		X										X											X											implementation discontinuation
Dilokthornsakul P, Chaiyakunapruk N, Nimpitakpong P, Jeanpeerapong N, Sruamsiri R	X			X	X	X	X	X																													initiation implementation
Dragomir A, Cote R, Roy L, Blais L, Lalonde L, Berard A, Perreault S	X			X	X	X																				X											initiation implementation
Dragomir A, Cote R, White M, Lalonde L, Blais L, Berard A, Perreault S	X			X	X	X																				X											initiation implementation
Eaddy M, Grogg A, Locklear J	X				X	X	X	X					X													X		X									initiation implementation discontinuation
Egede LE, Gebregziabher M, Dismuke CE, Lynch CP, Axon RN, Zhao Y, Mauldin PD	X				X	X	X	X																		X											implementation
Eisenberg DF, Placzek H, Gu T, Krishna A, Tulsi BB	X		X		X	X	X	X	X				X													X											initiation implementation discontinuation
Ettinger AB, Manjunath R, Candrilli SD, Davis KL	X		X		X	X	X		X				X	X												X	X										initiation implementation
Faught RE, Weiner JR, Guerin A, Cunnington MC, Duh MS	X		X		X	X	X	X	X																	X	X										initiation implementation discontinuation
Gentil L, Vasiliadis HM, Preville M, Berbiche D	X		X		X	X	X	X					X													X											implementation
Gilmer TP, Dolder CR, Lacro JP, Folsom DP, Lindamer L, Garcia P, Jeste DV	X		X		X	X		X																		X											implementation
Gosselin A, Luo R, Lohoues H, Toy E, Lewis B, Crawley J, Duh MS	X		X		X	X	X	X																		X											initiation implementation discontinuation
Hagen SE, Wright DW, Finch R, Talamonti WJ, Edington DW	X			X	X																					X					X						implementation
Halpern R, Becker L, Iqbal SU, Kazis LE, Macarios D, Badamgarav E	X				X																																initiation implementation
Hansen RA, Farley JF, Droege M, Maciejewski ML	X			X	X	X	X	X																		X											implementation
Hazel-Fernandez L, Louder AM, Foster SA, Uribe CL, Burge RT	X			X	X	X	X	X	X																	X											initiation implementation discontinuation
Hong J, Reed C, Novick D, Haro JM, Aguado J	X		X	X	X	X	X																			X											implementation
Hong JS, Kang HC	X		X		X	X																															initiation implementation
Huybrechts KF, Ishak KJ, Caro JJ	X		X		X	X															X																initiation implementation discontinuation
Ivanova JI, Bergman RE, Birnbaum HG, Phillips AL, Stewart M, Meletiche DM	X	X	X	X	X	X	X	X	X																	X					X				X		implementation
Jha AK, Aubert RE, Yao J, Teagarden JR, Epstein RS	X		X		X	X			X																												implementation
Jiang Y, Ni W	X		X		X											X										X											initiation implemention discontinuation
Joe S and Lee JS			X		X																																implemention discontinuation
Joshi AV, Madhavan SS, Ambegaonkar A, Smith M, Scott VG, Dedhia H		X			X																													X	X	X	implementation
Kane SV, Chao J, Mulani PM	X				X	X		X	X																	X											initiation implementation discontinuation
Kjellberg J, Jorgensen AD, Vestergaard P, Ibsen R, Gerstoft F, Modi A	X		X		X																																initiation implementation
Knapp M, King D, Pugner K, Lapuerta P	X		X		X	X	X										X																				implementation
Lee A, Song X, Khan I, Belozeroff V, Goodman W, Fulcher N, Diakun D	X		X		X	X	X	X	X																	X	X										initiation implementation discontinuation
Leider HL, Dhaliwal J, Davis EJ, Kulakodlu M, Buikema AR	X			X	X	X	X	X																		X											implementation
Miravitlles M, Sicras A, Crespo C, Cuesta M, Brosa M, Galera J, Lahoz R, Lleonart M, Riera MI	X				X	X			X			X	X							X		X	X	X		X											implementation
Mitra D, Hodgkins P, Yen L, Davis KL, Cohen RD	X				X	X	X	X	X					X												X											initiation implementation discontinuation
Modi A, Siris ES, Tang J, Sen S	X		X		X	X	X	X	X																	X		X									initiation implementation
Offord S, Lin J, Mirski D, Wong B	X		X		X	X		X																		X											initiation implementation discontinuation
Offord S, Lin J, Wong B, Mirski D, Baker RA	X				X	X	X																			X											initiation implementation
Olsen KR, Hansen C, Abrahamsen B	X				X																				X												initiation implementation
Pittman DG, Chen W, Bowlin SJ, Foody JM	X			X	X																					X											implementation
Pittman DG, Tao Z, Chen W, Stettin GD	X			X	X	X		X	X																	X											implementation
Pruitt Z, Robst J, Langland-Orban B, Brooks RG	X		X		X	X	X	X		X																X	X										initiation implementation
Quittner AL, Zhang J, Marynchenko M, Chopra PA, Signorovitch J, Yushkina Y, Riekert KA				X	X																																implementation
Rizzo JA and Simons WR				X	X																																initiation implementation
Robertson AG, Swanson JW, Van Dorn RA, Swartz MS	X		X			X	X	X	X									X	X							X			X	X							implementation
Robinson RL, Long SR, Chang S, Able S, Baser O, Obenchain RL, Swindle RW	X		X			X		X	X				X													X											initiation implementation
Ruetsch C, Tkacz J, Nadipelli VR, Brady BL, Ronquest N, Un H, Volpicelli J	X			X	X	X	X	X	X				X													X											initiation implementation discontinuation
Sokol MC, McGuigan KA, Verbrugge RR, Epstein RS	X		X		X																					X											implementation
Stroupe KT, Teal EY, Tu W, Weiner M, Murray MD	X			X		X	X	X																		X											implementation
Sunyecz JA, Mucha L, Baser O, Barr CE, Amonkar MM	X			X		X	X	X	X															X		X											initiation implementation discontinuation
Svarstad BL, Shireman TI, Sweeney JK	X					X																															implementation
Tan H, Cai Q, Agarwal S, Stephenson JJ, Kamat S	X				X																																initiation implementation
Tkacz J, Volpicelli J, Un H, Ruetsch C	X			X		X	X	X	X																	X											implementation
Wan GJ, Kozma CM, Slaton TL, Olson WH, Feagan BG	X		X	X		X	X	X	X																	X											initiation implementation discontinuation
Wei YJ, Palumbo FB, Simoni-Wastila L, Shulman LM, Stuart B, Beardsley R, Brown CH	X		X			X	X																			X											initiation implementation discontinuation
White TJ, Vanderplas A, Chang E, Dezii CM, Abrams GD	X		X		X																					X											implementation
White TJ, Vanderplas A, Ory C, Dezii CM, Chang E	X		X		X																					X											initiation implementation discontinuation
Wu EQ, Johnson S, Beaulieu N, Arana M, Bollu V, Guo A, Coombs J, Feng W, Cortes J	X		X			X	X	X	X																	X	X										initiation implementation
Wu J, Seiber E, Lacombe VA, Nahata MC, Balkrishnan R	X			X	X																					X											implementation
Wu N, Chen S, Boulanger L, Fraser K, Bledsoe SL, Zhao Y	X			X		X	X	X																		X											initiation implement
Zhao Y, Chen SY, Wu N, Fraser KA, Boulanger L	X		X			X	X	X																		X											initiation implementation discontinuation
Zhao Y, Johnston SS, Smith DM, McMorrow D, Krege J, Krohn K	X			X		X	X	X																		X											initiation implementation
Zhao Y, Johnston SS, Smith DM, McMorrow D, Krohn K, Krege J	X			X		X	X	X																		X											initiation implementation
Zhao Y, Zabriski S, Bertram C	X			X	X																					X											initiation implementation
