# Supplementary material for: An evidence-based model to consolidate medication adherence cost estimation: the medication adherence cost estimation framework
Source: Atypon-hosted journal article supplement (doi:10.2217/cer-2018-0099), 2019-05-22
Supplement: supplementary table 2.docx [file supplementary%20table%202.docx]

**Supplementary table 2: Studies identified with medication non-adherence costs reported by cost outcome indicator and total cost**

| Author, Year, Country | Core cost outcome indicators | Subcategory cost outcome indicators | Economic impact of cost outcome indicator (USD, 2018)[[1]](#footnote-1) |
| --- | --- | --- | --- |
| *An et al[*[*1*](#_ENREF_1)*]*  2014  Korea | Direct costs | Hospital costs | Currency Year: USD, 2007  Cost of Non-adherence†: TC:$1657.11 ($1986.66), OC: $1413.99 ($1695.70), HC:$243.11 ($291.14) |
| *Aubert et al[*[*2*](#_ENREF_2)*]*  2010  US | Direct costs | Primary Care Costs | Currency Year: USD, 2002  Cost of Non-adherence: THC:$5289.61 ($7239.48), MC:$4908.09 ($6717.23) |
| *Bagalman et al[*[*3*](#_ENREF_3)*]*  2010  US | Indirect costs | Workplace costs | Currency Year: USD, 2005  Cost of Non-adherence: TC:$6894 ($8723.70), STDC:$2134 ($2700.38), WCC:$762 ($964.23), PTOC:$3998 ($5059.1) |
| *Candrilli et al[*[*4*](#_ENREF_4)*]*  2011  US | Direct costs | Hospital costs  Pharmacy costs  Primary care costs | Currency Year: USD, 2008  Cost of Non-adherence:  All cause:  TC:$ 20436 ($23971.88), IC:$9780 ($11472.16), EDC:$837 ($981.81), PC:$2579 ($3025.22), POC:$3483 ($4085.63), AC:$3911 ($4587.69)  Disease state specific:  TC:$12097 ($14190.04), IC:$7315 ($8580.65), EDC:$552 ($647.50), PC:$158 ($185.33), POC:$1865 ($2187.68), AC:$2466 ($2892.67) |
| *Casciano et al[*[*5*](#_ENREF_5)*]*  2013  US | Direct costs | Hospital costs  Pharmacy costs  Primary Care costs | Currency Year: USD, 2005  Cost of Non-adherence†: TC:$16612.44 ($21021.5), IC:$9382.56 ($11872.78), OC:$8605.92 ($10889.97), PC:$2388.24 ($3022.15), MC:$15235.80 ($19279.92) |
| *Cooke et al[*[*6*](#_ENREF_6)*]*  2014  US | Direct costs | Hospital costs  Pharmacy costs | Currency Year: USD, 2011  Cost of Non-adherence:  THC:$18868 ($21282.86),IC:$2700 ($3045.56),OC:$915 ($1032.11), PC:$15253 ($17205.19) |
| *Curtis et al[*[*7*](#_ENREF_7)*]*  *2017*  *US* | Direct costs | Hospital costs  Pharmacy costs | Currency Year: USD, 2014  Cost of Non-adherence: TC:$38633 ($41143.25),OC:$16964 ($18066.3), PC:$9390 ($10000.13), ACC:$12153 ($12942.66) |
| *Darkow et al[*[*8*](#_ENREF_8)*]*  2007  US | Direct costs | Hospital costs  Pharmacy costs  Primary Care costs  Direct non-medical costs | Currency Year: USD, 2004  Cost of Non-adherence:  ≥95% adherence:  THC:$42250 ($55178.33), IC:$1156 ($1509.72), OC:$9299 ($12144.45), EDC:$36 ($47.01), PC:$29056 ($37947.02), MC:$10731 ($14014.64), OtPC:$2462 ($3215.36), OtC:$241 ($314.742)  90-95% adherence:  THC:$39236 ($51242.06), IC:$1362 ($1778.76), EDC:$568 ($741.81), OC:$11148 ($14559.25), PC:$23693 ($30942.96), MC:$13452 ($17568.25), OtPC:$2091 ($2730.843), OtC:$374 ($488.44)  50-90% adherence:  THC:$54770 ($71529.4), IC:$19096 ($24939.3), OC:$14631 ($19108.02), EDC:$104 ($135.81), PC:$18330 ($23938.91), MC:$34202 ($44667.68), OtPC:$2238 ($2922.82), OtC:$371 ($484.52)  <50% adherence:  THC:$131357 ($171551.7), IC:$81572 ($106532.7), OC:$33956 ($44346.4), EDC:$183 ($238.99), PC:$8733 ($11405.26), MC:$116892 ($152660.5), OtPC:$5732 ($7485.967), OtC:$1181 ($1542.38) |
| *Davis et al[*[*9*](#_ENREF_9)*]*  2017  US | Direct costs | Hospital costs  Pharmacy costs | Currency Year: USD, 2014  Cost of Non-adherence†:  All cause, ≥80% adherence:  TC:$22546 ($24011.32), OC:$7816 ($8323.85), PC:$7954 ($  8470.83), HC:$6106 ($6503.09)  All cause, 50-80% adherence:  TC:$25545 ($27204.83), OC:$8225 ($8759.43), PC:$6862 ($7307.87), HC:$9391 ($10001.19)  All cause, 30-50% adherence:  TC:$24303 ($25882.13), OC:$8365 ($8908.52), PC:$5485 ($5841.4), HC:$9171 ($9766.90)  All cause, <30% adherence:  TC:$25148 ($26782.04), OC:$8857 ($9432.49), PC:$4395 ($4680.57), HC:$10849 ($11553.93)  Disease state specific, ≥80% adherence:  TC:$8075.33 ($8600.03), OC:$2194.33 ($2336.91), PC:$4464 (  4754.05), HC:$1074.67 ($1144.50)  Disease state specific, 50-80% adherence:  TC:$7053 ($7511.28), OC:$1947 ($2073.51), PC:$3345 ($3562.35), HC:$1155 ($1230.04)  Disease state specific, 30-50% adherence:  TC:$6623 ($7053.34), OC:$1997 ($2126.76), PC:$2307 ($2456.90), HC:$1619 ($1724.1)  Disease state specific, <30% adherence:  TC:$5644 ($6010.72), OC:$2152 ($2291.82), PC:$1569 ($1670.94),HC:$1405 ($1496.29) |
| *Davis et al[*[*10*](#_ENREF_10)*]*  2010  US | Direct costs | Pharmacy costs  Primary Care costs | Currency Year: USD, 2001  Cost of Non-adherence: TC:$18511 ($25582.52), PC:$2684 ($3729.83), MC:$15827 ($21994.11) |
| *Delea et al[*[*11*](#_ENREF_11)*]*  2008  US | Direct costs | Hospital costs  Direct non-medical costs | Currency Year: USD, 2003  Cost of Non-adherence†:  ≥75% adherence:  TC:$1564 ($2098.56), OC:$1272 ($1706.76), EDC:$32 ($42.93), OtC:$292 ($391.80)  50-75% adherence:  TC:$1128 ($1513.54), OC:$852 ($1143.20), EDC:$36 ($48.30), OtC:$276 ($370.33)  25-50% adherence:  TC:$900 ($1207.61), OC:$600 ($805.07), EDC:$60 ($80.50), OtC:$300 ($402.54)  <25% adherence:  TC:$632 ($848.01), OC:$388 ($520.61), EDC:$48 ($64.40), OtC:$240 ($322.02) |
| *Delea et al[*[*12*](#_ENREF_12)*]*  2011  US | Direct costs | Hospital costs  Pharmacy costs  Direct non-medical costs | Currency Year: USD, 2005  Cost of Non-adherence:  Adjusted all cause:  TC:$19686 ($24910.8), IC:$5954 ($7534.22), PC:$6391 ($8087.21), OtC:$8795 ($11129.26)  Adjusted disease state specific:  TC:$8574 ($10849.59), IC:$3705 ($4688.32), PC:$3850 ($4871.81), OtC:$1884 ($2384.02)  Unadjusted all cause:  TC:$19362 ($24500.8), IC:$5463 ($6912.91), PC:$6158 ($7792.37), OtC:$7740 ($9794.24)  Unadjusted disease state specific:  TC:$9156 ($11586.07), IC:$3238 ($4097.38), PC:$3789 ($4794.62), OtC:$2129 ($2694.05) |
| *Diehl et al[*[*13*](#_ENREF_13)*]*  2010  US | Direct costs | Pharmacy costs  Primary care costs | Currency Year: USD, 2007  Cost of Non-adherence: TC:$19093.46 ($22834.47), PC:$7647.40 ($9145.76), SCǂ:$11604.03 ($13877.59) |
| *Dilokthornsakul et al[*[*14*](#_ENREF_14)*]*  2012  Thailand | Direct costs | Hospital costs | Currency Year: USD, 2004  Cost of Non-adherence: THC:$1157 ($1511.03), IC:$1019 ($1330.80), OC:$138 ($180.23) |
| *Dragomir et al[*[*15*](#_ENREF_15)*]*  2010  Canada | Direct Costs | Hospital costs  Pharmacy costs  Primary Care costs | Currency Year: CAD, 2006  Cost of Non-adherence:  Unadjusted Disease state specific:  THC:$7165 ($7276.36), PC: $1800 ($1827.97), MC: $1370 ($1391.29), HC: $3995 ($4057.09)  Unadjusted Hospitalized patients:  THC: $17397 ($17667.38), PC:$2685 ($2726.73), MC:$2608 ($2648.53), HC: $12104 ($12292.11)  Predicted disease state specific: HC:$3877 ($3937.25)  Predicted hospitalized patient: HC:$11715 ($11897.07) |
| *Dragomir et al[*[*16*](#_ENREF_16)*]*  2010  Canada | Direct Costs | Hospital costs  Pharmacy costs  Primary Care costs | Currency Year: CAD, 2005  Cost of Non-adherence:  Unadjusted Disease state specific:  THC:$6243 ($6511.79), PC:$2506 ($2613.89), MC:$1241 ($1294.42), HC:$2496 ($2603.47)  Unadjusted Hospitalized patients:  THC:$14725 ($15358.99), PC:$3374 ($3519.26), MC:$2475 ($2581.55), HC:$8876 ($9258.15)  Predicted disease state specific: HC:$2669 ($2783.91)  Predicted hospitalized patient: HC$9214 ($9610.71) |
| *Eisenberg et a[*[*17*](#_ENREF_17)*]*  2015  US | Direct costs | Hospital costs  Pharmacy costs  Primary care costs | Currency Year: USD, 2012  Cost of Non-adherence:  all cause:  TC:$7237 ($7961.57), IC:$1986 ($2184.83), OC:$2057 ($2262.94), EDC:$258 ($283.82), PC:$2197 ($2416.96), POC:$738 ($811.88)  Disease state specific:  TC:$674 ($741.48), IC:$334 ($367.44), OC:$77 ($84.71), EDC:$5 ($5.50), PC:$213 ($234.32), POC:$44 ($48.40) |
| *Ettinger et al[*[*18*](#_ENREF_18)*]*  2009  US | Direct costs | Hospital costs  Pharmacy costs  Primary care costs | Currency Year: USD, 2003  Cost of Non-adherence: TC:$17817 ($23906.75), IC:$2714 ($3641.63), EDC:$526 ($705.78), PC:$347 ($465.60), POC:$3063 ($4109.91), AC:$8344 ($11195.94), OtPC:$2822 ($3786.54) |
| *Faught et al[*[*19*](#_ENREF_19)*]*  2009  US | Direct costs | Hospital costs  Pharmacy costs | Currency Year: USD, 2002  Cost of Non-adherence†: TC:$14417.64 ($19732.17), IC:$6682.28 ($7247.51), OC:$2172.40 ($2973.17), EDC:$405.96 ($555.60), PC:$822.40 ($1125.54), OtPC:$4334.60 ($5932.39) |
| Gentil et al[[20](#_ENREF_20)]  2015  Canada | Direct costs | Hospital costs  Pharmacy costs  Primary care costs | Currency Year: CAD, 2010  Cost of Non-adherence:  Adjusted all cause:  TC:$11124 ($10352.92), IC:$7419 ($6904.74), OC: $2687 ($2500.74), PC: $504 ($469.06), POC:$513 ($477.43)  Adjusted disease state specific:  TC:$4477 ($4166.61), IC:$2836 ($2639.41), OC: $1518 ($1412.77), PC⸿: $-444 ($-413.22), POC:$568 ($545.38)  Unadjusted all cause:  TC:$14979 ($13940.7), IC:$6351 ($5910.77), OC: $4058 ($3776.71), PC: $3503 ($3260.17), POC:$1066 ($992.1068)  Unadjusted disease state specific:  TC:$9008 ($8383.59), IC:$2854 ($2656.16), OC: $2654 ($2470.03), PC: $2498 ($2324.84), POC:$1002 ($932.54) |
| *Gilmer et al[*[*21*](#_ENREF_21)*]*  2004  US | Direct costs | Hospital costs  Pharmacy costs | Currency Year: USD, 1999  Cost of Non-adherence: TC:$8168 ($11874.51), OC:$3464 ($5035.91), PC:$1542 ($2241.73), HC:$3413 ($4961.76) |
| *Gosselin et al[*[*22*](#_ENREF_22)*]*  2009  US | Direct costs | Hospital costs  Pharmacy costs  Primary Care costs | Currency Year: USD, 2003  Cost of Non-adherence: TC:$9497 ($12743.02), IC:$2116 ($2839.23), OC:$5458 ($7323.51), PC:$1922 ($2578.93), MC:$7575 ($10164.09) |
| *Hansen et al[*[*23*](#_ENREF_23)*]*  2010  US | Direct costs | Hospital costs  Pharmacy costs | Currency Year: USD, 2005  Cost of Non-adherence§:  All cause:  THC:$15448.50 ($19548.69), IC:$4242.33 ($5368.27),  OC:$ 7377.83 ($9283.6), PC:$3828 ($4843.97)  Disease state specific:  THC:$3232.33 ($4090.22), IC:$873.50 ($1105.33), OC:$1545.67 ($1955.89), PC:$812.67 ($1028.35) |
| *Hazel-Fernandez et al[*[*24*](#_ENREF_24)*]*  2013  US | Direct costs | Hospital costs  Pharmacy costs | Currency Year: USD, 2010  Cost of Non-adherence†:  ≥80% adherence:  THC:$21033 ($24190.73), IC:$2198 ($2527.99), OC:$5151 ($5924.33), EDC:$211 ($242.67), PC:$13472 ($15494.58)  50-80% adherence:  THC:$25574 ($29413.48), IC:$8448 ($9716.31), OC:$6439 ($7405.70), EDC:$330 ($379.54), PC:$10358 ($11913.07)  <50% adherence:  THC:$15528 ($17859.25), IC:$4897 ($5632.19), OC:$5806 ($6677.66), EDC:$465 ($534.80), PC:$4361 ($5015.72)  Fracture related, ≥80% adherence:  THC:$12670 ($14572.17), IC:$366 ($420.95), OC:$1048 ($1205.341), EDC:$6 ($6.89), PC:$10810 ($12432.93)  Fracture related, 50-80% adherence:  THC:$9292 ($10687.02), OC:$955 ($1098.381), IC:$830 ($954.61), EDC:$9 ($10.35), PC:$7420 ($8533.97)  Fracture related, <50 adherence:  THC:$4419 ($5082.43), IC:$1325 ($1523.92), OC:$767 ($882.15), EDC:$44 ($50.60), PC:$2068 ($2378.46) |
| *Hong et al[*[*25*](#_ENREF_25)*]*  2011  UK | Direct costs | Hospital costs  Pharmacy costs | Currency Year: GBP, 2008  Cost of Non-adherence†: TC:£5846.29 ($10506.27), IC:£2740.57 ($4925.03), OC:£1082.86 ($1945.99), PC:£1630.29 ($2929.76), HC:£337.14 ($605.86) |
| *Hong et al[*[*26*](#_ENREF_26)*]*  2011  South Korea | Direct costs | Hospital costs | Currency Year: KRW, 2007  Cost of Non-adherence: TC:₩765453 ($1204.46), HC:₩397549 ($625.56) |
| *Huybrechts et al[*[*27*](#_ENREF_27)*]*  2006  US | Direct costs | Primary care costs | Currency Year: USD, 2000  Cost of Non-adherence: TC:$7200 ($10234.59), MC:$1476 ($2098.11), InstC:$5736 ($8153.55) |
| *Ivanova et al[*[*28*](#_ENREF_28)*]*  2012  US | Direct costs  Indirect costs | Hospital costs  Pharmacy costs  Primary Care costs  Workplace costs | Currency Year: USD, 2007  Cost of Non-adherence†:  All cause:  TC:$8079 ($9781.52), THC:$6022 ($7201.89), IC:$1030.50 ($1232.40), OC:$3231 ($3864.05), EDC:$143.50 ($171.61), PC:$1617 ($1933.82), MC:$4405.50 ($5268.67)  Disease state specific:  TC:$3005 ($3593.77), IC:$505 ($603.94), OC:$1710 ($2045.04),EDC:$37 ($44.25), PC:$753 ($900.54), MC:$2252 ($2693.24)  Indirect:  STDC:$1231 ($1472.19), AbC:$826 ($987.83) |
| *Jiang et al[*[*29*](#_ENREF_29)*]*  2015  US | Direct costs | Pharmacy costs  Primary care costs | Currency Year: USD, 2011  Cost of Non-adherence: TC:$14141 ($15307.29), PC:$3971 ($4298.51), MSC:$10170 ($11008.78) |
| *Joshi et al[*[*30*](#_ENREF_30)*]*  2006  US | Indirect costs | Workplace costs | Currency Year: USD, 2002  Cost of Non-adherence¶:  High adherence:  TPC:$1210.90 ($1657.25), AbC:$633.70 ($867.28), PrC:$577.20 ($789.96)  Medium adherence:  TPC:$1428.50 ($1955.05), AbC:$608.90 ($833.34), PrC:$819.60 ($1121.71)  Low adherence:  TPC:$1073.10 ($1468.65), AbC:$474.80 ($649.81), PrC:$598.30 ($818.84) |
| *Kjellberge al[*[*31*](#_ENREF_31)*]*  2016  Denmark | Direct costs | Primary Care costs | Currency Year: Euro, 2011  Cost of Non-adherence:  all cause:  TC:€4933 ($6547.45), MC:€3471 ($4606.93)  Disease state specific:  TC:€754 ($1000.76), MC:€426 ($565.41) |
| *Lee et al[*[*32*](#_ENREF_32)*]*  2011  US | Direct costs | Hospital costs  Pharmacy costs | Currency Year: USD, 2010  Cost of Non-adherence: TC:$126996 ($146062.2), IC:$14844 ($17072.56), OC:$101854 ($117145.6), EDC:$734 ($844.19), PC:$3244 ($3731.02), OtPC:$9564 ($10999.87) |
| *Leider et al[*[*33*](#_ENREF_33)*]*  2011  US | Direct costs | Hospital costs  Pharmacy costs  Primary Care costs | Currency Year: USD, 2008  Cost of Non-adherence: THC:$26433 ($31006.49), IC:$6361 ($7461.59), OC:$9734 ($11418.2), EDC:$421 ($493.84),  PC:$7960 ($9337.26), MC:$1957 ($2295.60) |
| *Modi et al[*[*34*](#_ENREF_34)*]*  2015  US | Direct costs | Hospital costs  Pharmacy costs  Primary Care costs  Direct non-medical costs | Currency Year: USD, 2011  Cost of Non-adherence:  all cause:  TC:$11749 ($13163.41), IC:$8768 ($9823.53), OC:$3945 ($4419.91), EDC:$104 ($116.52), PC:$2981 ($3339.87), MC:$8768 ($9823.53), OtC:$997 ($1117.02)  Disease state specific:  TC:$630 ($705.84), IC:$443 ($496.33), OC:$158 ($177.02), EDC:$3 ($3.36), PC:$325 ($364.12), OtC:$26 ($29.13) |
| *Offord et al[*[*35*](#_ENREF_35)*]*  2013  US | Direct costs | Hospital costs  Pharmacy costs | Currency Year: USD, 2008  Cost of Non-adherence:  all cause:  TC:$15400 ($18064.54), OC:$5773 ($6771.85), PC:$3777 ($4430.50), HC:$5850 ($6862.17)  Disease state specific:  TC:$5358 ($6285.05), OC:$858 ($1006.45), PC:$1549 ($1817.01), HC:$2952 ($3462.76) |
| *Pittman et al[*[*36*](#_ENREF_36)*]*  2011  US | Direct Costs | Pharmacy Costs  Primary Care costs | Currency Year: USD, 2009  Cost of Non-adherence†:  >80% adherence:  THC:$6798.67 ($7914.05), PC:$1767.33 ($2057.27), MC:$4472.67 ($15750.57)  60-79% adherence:  THC:$7072.67 ($8233.01), PC:$1789.33 ($2082.88), MC:$4840.67 ($5634.83)  <59% adherence:  THC:$7401.33 ($8615.59), PC:$1937.33 ($2255.16), MC:$5138.67 ($5981.72) |
| *Pittman et al[*[*37*](#_ENREF_37)*]*  2010  US | Direct costs | Hospital costs  Pharmacy Costs | Currency Year: USD, 2008  Cost of Non-adherence:  Adjusted, >80% adherence:  THC:$7261 ($8517.31), OC:$3390 ($3976.56), EDC:$101 ($118.47), PC:$2383 ($2795.30), HC:$1386 ($1625.80)  Adjusted, 60-79% adherence:  THC:$7530 ($8832.86), OC:$3705 ($4346.04), EDC:$134 ($157.18), PC:$1932 ($2266.27), HC:$1759 ($2063.34)  Adjusted, <59% adherence:  THC:$7370 ($8645.17), OC:$3776 ($4429.33), EDC:$172 ($201.76), PC:$1509 ($1770.09), HC:$1913 ($2243.98)  Unadjusted, >80% adherence:  THC:$7182 ($8424.64), OC:$3396 ($3983.57), EDC:$102 ($119.64), PC:$2317 ($2717.89), HC:$1366 ($1602.34)  Unadjusted, 60-79% adherence:  THC:$7560 ($8868.04), OC:$3635 ($4263.93), EDC:$131 ($153.67), PC:$2034 ($2385.92), HC:$1759 ($2063.34)  Unadjusted, <59% adherence:  THC:$7995 ($9378.30), OC:$3887 ($4559.541), EDC:$172 ($201.76), PC:$1880 ($2205.28), HC:$2057 ($2412.90) |
| *Pruitt et al[*[*38*](#_ENREF_38)*]*  2015  US | Direct costs | Hospital costs  Pharmacy costs | Currency Year: USD, 2009  Cost of Non-adherence†:  HIV:  TC:$15360 ($17880), IC:$3864 ($4497.86), OC:$3948 ($4595.67),PC:$4956 ($5769.11), OtPC:$1764 ($2053.44), BHIC:$840 ($977.81)  AIDS:  TC:$27648 ($32183.9), IC:$13008 ($15142.16), OC:$5880 ($6844.73), PC:$5640 ($6565.36), OtPC:$2580 ($3003.30), BHIC:$528 ($614.68) |
| *Robertson et al[*[*39*](#_ENREF_39)*]*  *2014*  *US* | Direct costs  Indirect costs | Hospital costs  Pharmacy costs  Primary care costs  Societal costs | Currency Year: USD,2005  Cost of Non-adherence†:  60-91 days covered:  TC:$28068 ($35318.22), IC:$12168 ($15311.11), OC:$6468 ($  8138.74), EDC:$96 ($120.79), PC:$5316 ($6689.16), TCMC:$2100 ($2642.45), PAC:$240 ($301.99), ArC:$780 ($981.47), InC:$888 ($1117.38)  31-60 days covered:  TC:$21720 ($27330.48), IC:$10068 ($12668.65), OC:$4152 ($5224.49), EDC:$108 ($135.89), PC:$3468 ($4363.82), TCMC:$1404 ($1766.66), PAC:$228 ($286.89), ArC:$1032 ($1298.57), InC:$1272 ($1600.56)  1-30 days covered:  TC:$21084 ($26530.19), IC:$11376 ($14314.53), OC:$2916 ($3669.22), EDC:$144 ($181.20), PC:$2232 ($2808.54), TCMC:$1596 ($2008.26), PAC:$204 ($256.69), ArC:$1140 ($1434.47), InC:$1476 ($1857.26)  0 days covered:  TC:$12516 ($15748.99), IC:$5592 ($7036.46), OC:$2136 ($2687.74), EDC:$84 ($105.69), PC:$984 ($1238.17), TCMC:$516 ($649.28), PAC:$156 ($196.29), ArC:$1200 ($1509.97), InC:$1860 ($2340.45) |
| *Robinson et al[*[*40*](#_ENREF_40)*]*  2006  US | Direct costs | Hospital costs  Pharmacy costs  Primary care costs | Currency Year: USD, 2004  Cost of Non-adherence†:  all cause:  TC:$12658 ($16531.29), IC:$3006 ($3925.82), OC:$6118 ($7990.08), EDC:$334 ($436.19), PC:$3200 ($4179.18), POC:$178 ($232.46)  Disease state specific:  TC:$2028 ($2648.55), IC:$102 ($133.21), OC:$734 ($958.59),  EDC:$18 ($23.50), PC:$1174 ($1533.24),POC:$120 ($156.71) |
| Ruetsch et al[[41](#_ENREF_41)]  2017  US | Direct costs | Hospital costs  Pharmacy costs  Primary care costs | Currency Year: USD, 2013  Cost of Non-adherence: THC:$16555 ($17920.39),IC:$5657 ($6123.57), OC:$5594 ($58775.97), EDC:$1147 ($1241.60), PC:$2365 ($2560.06), POC:$1765 ($1910.57), MC:$14190 ($15360.34) |
| *Sokol et al[*[*42*](#_ENREF_42)*]*  2005  US | Direct Costs | Pharmacy Costs  Primary Care costs | Currency Year: USD, 1998  Cost of Non-adherence:  All cause, diabetes 80-100%:  TC:$8886 ($13102.76), PC:$2510 ($3701.09), MC:$6377 ($9403.141)  All cause, diabetes 60-79%:  TC:$11484 ($16933.61), PC:$2121 ($3127.502), MC:$9363 ($13806.11)  All cause, diabetes 40-59%:  TC:$12978 ($19136.58), PC:$1970 ($2904.84), MC:$11008 ($16231.72)  All cause, diabetes 20-39%:  TC:$13077 ($19282.55), PC:$1877 ($2767.71), MC:$11200 ($16514.84)  All cause, diabetes 1-19%:  TC:$16498 ($24326.95), PC:$1312 ($1934.59), MC:$15186 ($22392.36)  All cause, hypertension 80-100%:  TC:$8386 ($11885.73), PC:$1817 ($2679.24), MC:$6570 ($9687.72)  All cause, hypertension 60-79%:  TC:$8929 ($13166.16), PC:$1271 ($1874.14), MC:$7658 ($11292.02)  All cause, hypertension 40-59%:  TC:$9491 ($13994.85), PC:$1123 ($1655.91), MC:$8368 ($12338.94)  All cause, hypertension 20-39%:  TC:$11238 ($16570.88), PC:$952 ($1403.76), MC:$10286 ($15167.12)  All cause, hypertension 1-19%:  TC:$9747 ($14372.33), PC:$916 ($1350.68), MC:$8831 ($13021.66)  All cause, hypercholesterolemia 80-100%:  TC:$6752 ($9956.08), PC:$1972 ($2907.79), MC:$4780 ($7048.30)  All cause, hypercholesterolemia 60-79%:  TC:$8412 ($12403.83), PC:$1736 ($2559.796, MC:$6676 ($9844.02)  All cause, hypercholesterolemia 40-59%:  TC:$6756 ($9961.99), PC:$1247 ($1838.74), MC:$5509 ($8123.23)  All cause, hypercholesterolemia 20-39%:  TC:$7982 ($11769.77), PC:$1152 ($1698.66), MC:$6830 ($10071.1)  All cause, hypercholesterolemia 1-19%:  TC:$10916 ($16096.07), PC:$1067 ($1573.33), MC:$9849 ($14522.73)  All cause, CHF 80-100%:  TC:$22164 ($32681.69), PC:$3107 ($4581.38), MC:$19056 ($28098.83)  All cause, CHF 60-79%:  TC:$29785 ($43919.15), PC:$3412 ($5031.12), MC:$26373 ($38888.02)  All cause, CHF 40-59%:  TC:$26311 ($38796.6), PC:$2208 ($3255.78), MC:$24103 ($35540.82)  All cause, CHF 20-39%:  TC:$19188 ($28293.46), PC:$2055 ($3030.18), MC:$17133 ($25263.28)  All cause, CHF 1-19%:  TC:$23964 ($35335.86), PC:$1961 ($2891.56), MC:$22003 ($32444.29)  Disease state specific, diabetes 80-100%:  TC:$4570 ($6738.64), PC:$763 ($1125.07), MC:$3808 ($5615.05)  Disease state specific, diabetes 60-79%:  TC:$6291 ($9276.32), PC:$404 ($595.71), MC:$5887 ($8680.61)  Disease state specific, diabetes 40-59%:  TC:$6522 ($9616.94), PC:$285 ($420.24), MC:$6237 ($9196.69)  Disease state specific, diabetes 20-39%:  TC:$7124 ($10456.5), PC:$165 ($243.29), MC:$6959 ($10261.32)  Disease state specific, diabetes 1-19%:  TC:$8867 ($13074.74), PC:$55 ($81.09), MC:$8812 ($12993.64)  Disease state specific, hypertension 80-100%:  TC:$4871 ($7182.48), PC:$489 ($721.04), MC:$4383 ($6462.90)  Disease state specific, hypertension 60-79%:  TC:$5262 ($7759.02), PC:$285 ($420.24), MC:$4977 ($7338.78)  Disease state specific, hypertension 40-59%:  TC:$5297 ($7810.63), PC:$184 ($271.31), MC:$5113 ($7539.32)  Disease state specific, hypertension 20-39%:  TC:$6062 ($8938.66), PC:$89 ($131.23), MC:$5973 ($8807.41)  Disease state specific, hypertension 1-19%:  TC:$4878 ($7192.79), PC:$31 ($45.70), MC:$4847 ($7147.08)  Disease state specific, hypercholesterolemia 80-100%:  TC:$3924 ($5786.09), PC:$801 ($1181.11), MC:$3124 ($4606.46)  Disease state specific, hypercholesterolemia 60-79%:  TC:$5541 ($8170.41), PC:$603 ($889.14), MC:$4938 ($7281.27)  Disease state specific, hypercholesterolemia 40-59%:  TC:$3825 ($5640.11), PC:$373 ($550), MC:$3452 ($5090.11)  Disease state specific, hypercholesterolemia 20-39%:  TC:$4999 ($7371.22), PC:$213 ($314.07), MC:$4786 ($7057.14)  Disease state specific, hypercholesterolemia 1-19%:  TC:$6888 ($10156.62), PC:$78 ($115.01), MC:$6810 ($10041.61)  Disease state specific, CHF 80-100%:  TC:$12698 ($18755.33), PC:$437 ($644.37), MC:$12261 ($18079.33)  Disease state specific, CHF 60-79%:  TC:$13924 ($20531.49), PC:$158 ($232.9723), MC$13766 ($20298.51)  Disease state specific, CHF 40-59%:  TC:$11378 ($16777.31), PC:$134 ($197.58), MC:$11244 ($16579.72)  Disease state specific, CHF 20-39%:  TC:$7733 ($11402.61), PC:$90 ($132.70), MC:$7643 ($11269.9)  Disease state specific, CHF 1-19%:  TC:$9841 ($14510.94), PC:$15 ($22.12), MC:$9826 ($14488.82) |
| *Stroupe et al[*[*43*](#_ENREF_43)*]*  2006  US | Direct costs | Hospital costs  Pharmacy Costs | Currency Year: USD, 2002  Cost of Non-adherenceǂ: THC:$6032.5 ($8256.16), IC:$2067 ($2828.92), OC:$3965 ($5426.55), PC:$130 ($177.92) |
| *Sunyecz et al[*[*44*](#_ENREF_44)*]*  2008  US | Direct costs | Hospital costs  Pharmacy costs  Medical test costs | Currency Year: USD, 2005  Cost of Non-adherence:  All cause:  THC:$23660 ($29939.52), IC:$18839 ($23839), OC:$10061 ($12731.26), EDC:$832 ($1042.27), PC:$6941 ($8783.18), RC:$1079 ($1365.36)  Disease state specific:  THC:$1602 ($2027.18), IC:$14074 ($17809.34), OC:$501 ($633.96), EDC:$452 ($571.96), PC:$918 ($1161.64), RC:$184 ($232.83) |
| *Tkacz et al[*[*45*](#_ENREF_45)*]*  2014  US | Direct costs | Hospital costs  Pharmacy costs | Currency Year: USD, 2010  Cost of Non-adherence:  Adjusted:  THC:$49051 ($56415.13), IC:$26470 ($30444), OC:$14570 ($16757.42), EDC:$4439 ($5105.44), PC:$3581 ($4118.62)  Unadjusted:  THC:$47868 ($55054.53), IC:$26043 ($29952.89), OC:$14173 ($16300.82), EDC:$4058 ($4667.23), PC:$3557 ($4091.02) |
| *Wan et al[*[*46*](#_ENREF_46)*]*  2014  US | Direct costs | Hospital costs  Pharmacy costs | Currency Year: USD, 2009  Cost of Non-adherence:  All cause:  TC:$47411 ($55189.26), THC:$32522 ($37857.57), IC:$17634 ($20527.04), OC:$10909 ($12698.74), EDC:$458 ($533.14),  PC:$18410 ($21430.35)  Disease state specific:  TC:$33652 ($39172.96), THC:$18764 ($21842.43), IC:$12564 ($14625.25), OC:$5890 ($6856.31), EDC:$48 ($55.87), PC:$15150 ($17635.52) |
| *Wei et al[*[*47*](#_ENREF_47)*]*  2014  US | Direct costs | Hospital costs  Pharmacy costs | Currency Year: USD, 2007  Cost of Non-adherence:  90-100% adherence:  TC:$36407 ($43540.29), IC:$15294 ($18290.58), OC:$10155 ($12144.69), PC:$10957 ($13103.82)  80-89% adherence:  TC:$43417 ($51923.77), IC:$21603 ($25835.72), OC:$11838 ($14157.44), PC:$9976 ($11930.62)  ≤79% adherence:  TC:$45867 ($54853.81), IC:$24727 ($29571.81), OC:$12889 ($15414.36), PC:$8251 ($9867.63) |
| *White et al[*[*48*](#_ENREF_48)*]*  2003  US | Direct costs | Pharmacy costs  Primary Care costs | Currency Year: USD, 1999  Cost of Non-adherence: TC:$11815 ($17176.47), PC:$1123 ($  1632.59), MC:$10692 ($15543.87) |
| *White et al[*[*49*](#_ENREF_49)*]*  2004  US | Direct costs | Pharmacy costs  Primary Care costs | Currency Year: USD, 2000  Cost of Non-adherence:  Adjusted ≥95% adherence:  TC:$4835 ($6872.83), PC:$1429 ($2031.29), MC:$3406 ($4841.54)  Adjusted 75-95% adherence:  TC:$5314 ($7553.72), PC:$1157 ($1644.65), MC:$4157 ($5909.07)  Adjusted <75% adherence:  TC:$5706 ($8110.93), PC:$762 ($1083.16), MC:$4944 ($7027.77)  Unadjusted ≥95% adherence:  TC:$4809 ($6835.88), PC:$1402 ($1992.91), MC:$3407 ($4842.96)  Unadjusted 75-95% adherence:  TC:$5333 ($7580.72), PC:$1153 ($1638.95), MC:$4180 ($5941.77)  Unadjusted <75% adherence:  TC:$5605 ($7967.36), PC:$766 ($1088.84), MC:$4839 ($6878.52) |
| *Wu et al[*[*50*](#_ENREF_50)*]*  2011  US | Direct Costs | Pharmacy Costs  Primary Care costs | Currency Year: USD, 2005  Cost of Non-adherence:  all cause:  THC:$17807 ($22533.1), PC:$4915 ($6219.47) MC:$12892 ($16313.62)  Disease state specific:  THC:$2789 ($3529.22), PC:$489 ($618.78) MC:$2300 ($2910.44) |
| *Wu et al[*[*51*](#_ENREF_51)*]*  2009  US | Direct costs | Hospital costs  Pharmacy costs | Currency Year: USD, 2006  Cost of Non-adherence:  adjusted all cause, commercial:  THC:$32407 ($39785.38), IC:$12851 ($15492.2), OC:$11888 ($14594.64), PC$7667 ($9412.60)  Adjusted all cause, medicare:  THC:$24622 ($30227.9), IC:$ 6754 ($8291.73), OC:$10598 ($13010.94), PC:$7270 ($8925.22)  Adjusted disease state specific, diabetes commercial:  THC:$10024 ($12306.25), IC:$2232 ($2740.17), OC:$1989 ($2441.84), PC:$1451 ($1781.36)  Adjusted disease state specific, diabetes medicare:  THC:$5015 ($6156.80), IC:$2606 ($3199.32), OC:$1231 ($1511.26), PC:$1179 ($1447.43)  Adjusted disease state specific, DPNP commercial:  THC:$3565 ($4376.67), IC:$1739 ($2134.93), OC:$362 ($444.42), PC:$1464 ($1797.31)  Adjusted disease state specific, DPNP medicare:  THC:$2384 ($2926.78), IC:$1048 ($1286.60), OC:$181 ($222.20), PC:$1155 ($1417.97) |
| *Wu et al[*[*52*](#_ENREF_52)*]*  2010  US | Direct costs | Hospital costs  Pharmacy costs | Currency Year: USD, 2008  Cost of Non-adherence: TC:$107341 ($125913.4), IC:$44498 ($52197.14), OC:$34097 ($39996.54), EDC:$248 ($290.91),  PC:$22846 ($26798.86), OtPC:$5652 ($6629.92) |
| *Zhao et al[*[*53*](#_ENREF_53)*]*  2014  US | Direct Costs | Pharmacy Costs  Primary Care costs | Currency Year: USD, 2010  Cost of Non-adherence:  96-100% adherence:  THC:$6536.05 ($7517.32), PC:$449.86 ($517.4), MC:$3559.25 ($46270.09)  90-95% adherence:  THC:$6493.80 ($7468.72), PC:$439.74 ($505.75), MC:$3666.81 ($4217.32)  85-89% adherence:  THC:$6459.40 ($7429.16), PC:$458.83 ($527.71), MC:$3664 ($4214.08)  80-84% adherence:  THC:$6227.47 ($7162.41), PC:$423.15 ($486.67), MC:$3586.58 ($4125.03)  70-79% adherence:  THC:$5713.47 ($6571.24), PC:$356.74 ($410.30), MC:$3520.64 ($4049.20)  60-69% adherence:  THC:$5875.26 ($6757.32), PC:$371.30 ($427.04), MC:$3551.99 ($4085.25)  40-59% adherence:  THC:$5817.58 ($6690.98), PC:$279.21 ($321.13), MC:$3663.65 ($4213.68)  <40% adherence:  THC:$5249.12 ($6037.18), PC:$133.92 ($154.02), MC:$3499.95 ($4025.40) |
| *Zhao et al[*[*54*](#_ENREF_54)*]*  2014  US | Direct costs | Hospital costs  Pharmacy costs | Currency Year: USD, 2010  Cost of Non-adherence†:  Adjusted, ≥80% adherence:  THC:$34428 ($39596.76), IC:$7548 ($8681.18), OC:$9312 ($10710.08), PC:$18864 ($21696.13)  Adjusted, 50-80% adherence:  THC(50-80):$37956 ($43654.43), IC:$11520 ($1325.18), OC:$12816 ($14740.05), PC:$13116 ($15085.09)  Adjusted, <50% adherence:  THC:$31188 ($35870.34), IC:$11556 ($13290.91), OC:$13044 ($15002.34), PC:$7452 ($8570.72)  Unadjusted, ≥80% adherence:  THC:$37464 ($43088.59), IC:$7092 ($8156.72), OC:$9900 ($11386.26), PC:$20484 ($23559.28)  Unadjusted, 50-80% adherence:  THC:$35076 ($40342.01), IC:$11100 ($12766.44), OC:$11352 ($13056.32), PC:$12624 ($14519.25)  Unadjusted, <50% adherence:  THC:$29484 ($33910.52), IC:$10632 ($12228.18), OC:$11988 ($13787.79), PC:$6864 ($7894.55) |
| *Zhao et al[*[*55*](#_ENREF_55)*]*  2013  US | Direct costs | Hospital costs  Pharmacy costs | Currency Year: USD, 2010  Cost of Non-adherence†:  Adjusted, ≥80% adherence:  THC:$40212 ($46249.17), IC:$8136 ($9357.48), OC:$12924 ($14864.3), PC:$19392 ($22303.34)  Adjusted, 50-80% adherence:  THC:$40512 ($46594.21), IC:$12060 ($13870.54), OC:$14928 ($17169.16), PC:$13908 ($15995.98)  Adjusted, <50% adherence:  THC:$40128 ($46152.5), IC:$15444 ($17660.33), OC:$17568 ($20205.49), PC:$8700 ($10378.83)  Unadjusted, ≥80% adherence:  THC(≥80):$42768 ($49188.83), IC:$7620 ($8764.06), OC:$14580 ($16768.95), PC:$20568 ($23655.94)  Unadjusted, 50-80% adherence:  THC:$36780 ($42301.83), IC:$12228 ($14063.87), OC:$12108 ($13925.83), PC:$12444 ($14312.25)  Unadjusted, <50% adherence:  THC:$39792 ($45766.08), IC:$15768 ($18135.34), OC:$15324 ($17624.67),PC:$8700 ($10006.2) |
| *Zhao et al[*[*56*](#_ENREF_56)*]*  2011  US | Direct costs | Hospital costs  Pharmacy costs | Currency Year: USD, 2008  Cost of Non-adherence:  Commercial:  TC:$20323 ($23839.33),IC:$4808 ($5639.89), OC:$9822 ($11521.42), PC:$5693 ($6678.01)  Medicare:  TC:$25282 ($29656.35), IC:$8604 ($10092.68), OC:$10068 ($11809.98), PC:$6611 ($7754.85) |

A: adherent, NA: non-adherent, MA: moderate adherence, LA: low adherence, NC: non-compliance, NE: no exposure, CHF: chronic heart failure, THC: total healthcare costs, TC: total costs, IC: inpatient costs, OC: outpatient costs, EDC: emergency department visit costs, HC: hospitalisation costs, BHIC: behavioural health inpatient costs, ACC: acute care costs, PC: prescription medication costs, OtPC: other pharmacy costs, MC: medical costs, POC: physician office visit costs, AC: ancillary costs, PAC: psychiatric assessment costs, TCMC: targeted case management costs, SC: services costs, InstC: institutional costs, MSC: medical services costs, RC: radiology costs, STDC: short term disability costs, WCC: workers compensation costs, PTOC: paid time off costs, TPC: total productivity costs, AbC: absenteeism costs, PrC: presenteeism costs, ArC: arrest costs, InC: incarceration costs, OtC: other costs, USD: United States dollar, GBP: Great British Pound, EUR: Euro, CAD: Canadian dollar, KRW: South Korean won

†: extrapolated annual cost; ǂ: subgroups averaged; §: extrapolated annual cost and subgroups averaged; ¶: cost represents losses in workplace productivity; ⸿: negative value as costs modelled against adherent group

1. An S-Y, Kim HJ, Chun KH *et al.* Clinical and economic outcomes in medication-adherent and -nonadherent patients with type 2 diabetes mellitus in the Republic of Korea. *Clinical therapeutics*, 36, 245-254 (2014).

2. Aubert RE, Yao J, Xia F, Garavaglia SB. Is there a relationship between early statin compliance and a reduction in healthcare utilization? *The American journal of managed care*, 16, 459-466 (2010).

3. Bagalman E, Yu-Isenberg KS, Durden E, Crivera C, Dirani R, Bunn WB. Indirect costs associated with nonadherence to treatment for bipolar disorder. *Journal of occupational and environmental medicine / American College of Occupational and Environmental Medicine*, 52, 478-485 (2010).

4. Candrilli SD, O'Brien SH, Ware RE, Nahata MC, Seiber EE, Balkrishnan R. Hydroxyurea adherence and associated outcomes among Medicaid enrollees with sickle cell disease. *American journal of hematology*, 86, 273-277 (2011).

5. Casciano JP, Dotiwala ZJ, Martin BC, Kwong WJ. The costs of warfarin underuse and nonadherence in patients with atrial fibrillation: a commercial insurer perspective. *Journal of managed care pharmacy : JMCP*, 19, 302-316 (2013).

6. Cooke CE, Lee HY, Xing S. Adherence to antiretroviral therapy in managed care members in the United States: a retrospective claims analysis. *Journal of managed care pharmacy : JMCP*, 20, 86-92 (2014).

7. Curtis SE, Boye KS, Lage MJ, Garcia-Perez LE. Medication adherence and improved outcomes among patients with type 2 diabetes. *The American journal of managed care*, 23(7), e208-e214 (2017).

8. Darkow T, Henk HJ, Thomas SK *et al.* Treatment interruptions and non-adherence with imatinib and associated healthcare costs: a retrospective analysis among managed care patients with chronic myelogenous leukaemia. *PharmacoEconomics*, 25, 481-496 (2007).

9. Davis JR, Wu B, Kern DM *et al.* Impact of Nonadherence to Inhaled Corticosteroid/LABA Therapy on COPD Exacerbation Rates and Healthcare Costs in a Commercially Insured US Population. *American health & drug benefits*, 10(2), 92-102 (2017).

10. Davis KL, Edin HM, Allen JK. Prevalence and cost of medication nonadherence in Parkinson's disease: evidence from administrative claims data. *Movement disorders : official journal of the Movement Disorder Society*, 25(4), 474-480 (2010).

11. Delea TE, Stanford RH, Hagiwara M, Stempel DA. Association between adherence with fixed dose combination fluticasone propionate/salmeterol on asthma outcomes and costs*. *Current medical research and opinion*, 24, 3435-3442 (2008).

12. Delea TE, Thomas SK, Hagiwara M. The association between adherence to levodopa/carbidopa/entacapone therapy and healthcare utilization and costs among patients with Parkinson's disease: a retrospective claims-based analysis. *CNS drugs*, 25, 53-66 (2011).

13. Diehl JL, Daw JR, Coley KC, Rayburg R. Medical utilization associated with palivizumab compliance in a commercial and managed medicaid health plan. *Journal of managed care pharmacy : JMCP*, 16, 23-31 (2010).

14. Dilokthornsakul P, Chaiyakunapruk N, Nimpitakpong P, Jeanpeerapong N, Sruamsiri R. The Effects of Medication Supply on Hospitalizations and Health-Care Costs in Patients with Chronic Heart Failure. *Value in Health*, 15, S9-S14 (2012).

15. Dragomir A, Côté R, Roy L *et al.* Impact of adherence to antihypertensive agents on clinical outcomes and hospitalization costs. *Medical care*, 48, 418-425 (2010).

16. Dragomir A, Cote R, White M *et al.* Relationship between adherence level to statins, clinical issues and health-care costs in real-life clinical setting. *Value in health : the journal of the International Society for Pharmacoeconomics and Outcomes Research*, 13(1), 87-94 (2010).

17. Eisenberg DF, Placzek H, Gu T, Krishna A, Tulsi BB. Cost and consequences of noncompliance to oral bisphosphonate treatment. *Journal of managed care & specialty pharmacy*, 21(1), 56-65 (2015).

18. Ettinger AB, Manjunath R, Candrilli SD, Davis KL. Prevalence and cost of nonadherence to antiepileptic drugs in elderly patients with epilepsy. *Epilepsy & behavior : E&B*, 14, 324-329 (2009).

19. Faught RE, Weiner JR, Guérin A, Cunnington MC, Duh MS. Impact of nonadherence to antiepileptic drugs on health care utilization and costs: findings from the RANSOM study. *Epilepsia*, 50, 501-509 (2009).

20. Gentil L, Vasiliadis HM, Preville M, Berbiche D. Adherence to Oral Antihyperglycemic Agents Among Older Adults With Mental Disorders and Its Effect on Health Care Costs, Quebec, Canada, 2005-2008. *Preventing chronic disease*, 12, E230 (2015).

21. Gilmer TP, Dolder CR, Lacro JP *et al.* Adherence to treatment with antipsychotic medication and health care costs among Medicaid beneficiaries with schizophrenia. *The American journal of psychiatry*, 161, 692-699 (2004).

22. Gosselin A, Luo R, Lohoues H *et al.* The impact of proton pump inhibitor compliance on health-care resource utilization and costs in patients with gastroesophageal reflux disease. *Value in health : the journal of the International Society for Pharmacoeconomics and Outcomes Research*, 12, 34-39 (2009).

23. Hansen RA, Farley JF, Droege M, Maciejewski ML. A retrospective cohort study of economic outcomes and adherence to monotherapy with metformin, pioglitazone, or a sulfonylurea among patients with type 2 diabetes mellitus in the United States from 2003 to 2005. *Clinical therapeutics*, 32, 1308-1319 (2010).

24. Hazel-Fernandez L, Louder AM, Foster SA, Uribe CL, Burge RT. Association of teriparatide adherence and persistence with clinical and economic outcomes in Medicare Part D recipients: a retrospective cohort study. *BMC musculoskeletal disorders*, 14, 4 (2013).

25. Hong J, Reed C, Novick D, Haro JM, Aguado J. Clinical and economic consequences of medication non-adherence in the treatment of patients with a manic/mixed episode of bipolar disorder: results from the European Mania in Bipolar Longitudinal Evaluation of Medication (EMBLEM) study. *Psychiatry research*, 190, 110-114 (2011).

26. Hong JS, Kang HC. Relationship between oral antihyperglycemic medication adherence and hospitalization, mortality, and healthcare costs in adult ambulatory care patients with type 2 diabetes in South Korea. *Medical care*, 49, 378-384 (2011).

27. Huybrechts KF, Ishak KJ, Caro JJ. Assessment of compliance with osteoporosis treatment and its consequences in a managed care population. *Bone*, 38, 922-928 (2006).

28. Ivanova JI, Bergman RE, Birnbaum HG, Phillips AL, Stewart M, Meletiche DM. Impact of medication adherence to disease-modifying drugs on severe relapse, and direct and indirect costs among employees with multiple sclerosis in the US. *Journal of medical economics*, 15, 601-609 (2012).

29. Jiang Y, Ni W. Estimating the Impact of Adherence to and Persistence with Atypical Antipsychotic Therapy on Health Care Costs and Risk of Hospitalization. *Pharmacotherapy*, 35(9), 813-822 (2015).

30. Joshi AV, Madhavan SS, Ambegaonkar A, Smith M, Scott VG, Dedhia H. Association of medication adherence with workplace productivity and health-related quality of life in patients with asthma. *The Journal of asthma : official journal of the Association for the Care of Asthma*, 43, 521-526 (2006).

31. Kjellberg J, Jorgensen AD, Vestergaard P, Ibsen R, Gerstoft F, Modi A. Cost and health care resource use associated with noncompliance with oral bisphosphonate therapy: an analysis using Danish health registries. *Osteoporosis International*, 27(12), 3535-3541 (2016).

32. Lee A, Song X, Khan I *et al.* Association of cinacalcet adherence and costs in patients on dialysis. *Journal of medical economics*, 14, 798-804 (2011).

33. Leider HL, Dhaliwal J, Davis EJ, Kulakodlu M, Buikema AR. Healthcare costs and nonadherence among chronic opioid users. *The American journal of managed care*, 17, 32-40 (2011).

34. Modi A, Siris ES, Tang J, Sen S. Cost and consequences of noncompliance with osteoporosis treatment among women initiating therapy. *Current medical research and opinion*, 31(4), 757-765 (2015).

35. Offord S, Lin J, Mirski D, Wong B. Impact of early nonadherence to oral antipsychotics on clinical and economic outcomes among patients with schizophrenia. *Advances in therapy*, 30, 286-297 (2013).

36. Pittman DG, Chen W, Bowlin SJ, Foody JM. Adherence to statins, subsequent healthcare costs, and cardiovascular hospitalizations. *The American journal of cardiology*, 107, 1662-1666 (2011).

37. Pittman DG, Tao Z, Chen W, Stettin GD. Antihypertensive medication adherence and subsequent healthcare utilization and costs. *The American journal of managed care*, 16, 568-576 (2010).

38. Pruitt Z, Robst J, Langland-Orban B, Brooks RG. Healthcare costs associated with antiretroviral adherence among medicaid patients. *Applied health economics and health policy*, 13, 69-80 (2015).

39. Robertson AG, Swanson JW, Van Dorn RA, Swartz MS. Treatment participation and medication adherence: effects on criminal justice costs of persons with mental illness. *Psychiatric services (Washington, D.C.)*, 65(10), 1189-1191 (2014).

40. Robinson RL, Long SR, Chang S *et al.* Higher costs and therapeutic factors associated with adherence to NCQA HEDIS antidepressant medication management measures: analysis of administrative claims. *Journal of managed care pharmacy : JMCP*, 12, 43-54 (2006).

41. Ruetsch C, Tkacz J, Nadipelli VR *et al.* Heterogeneity of nonadherent buprenorphine patients: subgroup characteristics and outcomes. *The American journal of managed care*, 23(6), e172-e179 (2017).

42. Sokol MC, McGuigan KA, Verbrugge RR, Epstein RS. Impact of medication adherence on hospitalization risk and healthcare cost. *Medical care*, 43, 521-530 (2005).

43. Stroupe KT, Teal EY, Tu W, Weiner M, Murray MD. Association of Refill Adherence and Health Care Use Among Adults with Hypertension in an Urban Health Care System. *Pharmacotherapy*, 26, 779-789 (2006).

44. Sunyecz JA, Mucha L, Baser O, Barr CE, Amonkar MM. Impact of compliance and persistence with bisphosphonate therapy on health care costs and utilization. *Osteoporosis international : a journal established as result of cooperation between the European Foundation for Osteoporosis and the National Osteoporosis Foundation of the USA*, 19, 1421-1429 (2008).

45. Tkacz J, Volpicelli J, Un H, Ruetsch C. Relationship between buprenorphine adherence and health service utilization and costs among opioid dependent patients. *Journal of substance abuse treatment*, 46, 456-462 (2014).

46. Wan GJ, Kozma CM, Slaton TL, Olson WH, Feagan BG. Inflammatory bowel disease: healthcare costs for patients who are adherent or non-adherent with infliximab therapy. *Journal of medical economics*, 17, 384-393 (2014).

47. Wei Y-J, Palumbo FB, Simoni-Wastila L *et al.* Antiparkinson drug adherence and its association with health care utilization and economic outcomes in a Medicare Part D population. *Value in health : the journal of the International Society for Pharmacoeconomics and Outcomes Research*, 17, 196-204 (2014).

48. White TJV, Ann; Ory, Caron; Dezii, Christopher M.; Chang, Eunice. Economic Impact of Patient Adherence with Antidepressant Therapy Within a Managed Care Organization. *Disease Management & Health Outcomes*, 11(12), 817-822 (2003).

49. White TJV, Ann; Chang, Eunice; Dezii, Christopher M.; Abrams, Geoffrey D. The Costs of Non-Adherence to Oral Antihyperglycemic Medication in Individuals with Diabetes Mellitus and Concomitant Diabetes Mellitus and Cardiovascular Disease in a Managed Care Environment. *Disease Management & Health Outcomes*, 12(3), 181-188 (2004).

50. Wu J, Seiber E, Lacombe VA, Nahata MC, Balkrishnan R. Medical utilization and costs associated with statin adherence in Medicaid enrollees with type 2 diabetes. *The Annals of pharmacotherapy*, 45, 342-349 (2011).

51. Wu N, Chen S, Boulanger L, Fraser K, Bledsoe SL, Zhao Y. Duloxetine compliance and its association with healthcare costs among patients with diabetic peripheral neuropathic pain. *Journal of medical economics*, 12, 192-202 (2009).

52. Wu EQ, Johnson S, Beaulieu N *et al.* Healthcare resource utilization and costs associated with non-adherence to imatinib treatment in chronic myeloid leukemia patients. *Current medical research and opinion*, 26, 61-69 (2010).

53. Zhao Y, Zabriski S, Bertram C. Associations between statin adherence level, health care costs, and utilization. *Journal of managed care & specialty pharmacy*, 20, 703-713 (2014).

54. Zhao Y, Johnston SS, Smith DM, McMorrow D, Krege J, Krohn K. Association between teriparatide adherence and healthcare utilization and costs among hip fracture patients in the United States. *Bone*, 60, 221-226 (2014).

55. Zhao Y, Johnston SS, Smith DM, McMorrow D, Krohn K, Krege J. Association between teriparatide adherence and healthcare utilization and costs in real-world US kyphoplasty/vertebroplasty patients. *Osteoporosis International*, 24, 2525-2533 (2013).

56. Zhao Y, Chen S-Y, Wu N, Fraser KA, Boulanger L. Medication Adherence and Healthcare Costs among Fibromyalgia Patients Treated with Duloxetine. *Pain Practice*, 11, 381-391 (2011).

1. .Cost data adapted from “Economic impact of medication non-adherence by disease groups: a systematic review,” by Cutler et al, 2018 *BMJ Open;*8**:**e016982. doi: 10.1136/bmjopen-2017-016982 [↑](#footnote-ref-1)
